# Supplementary material for: Acceptability of COVID-19 Vaccines and Protective Behavior among Adults in Taiwan: Associations between Risk Perception and Willingness to Vaccinate against COVID-19
Source: MDPI journal article supplement (doi:10.3390/ijerph18115579), 2021-05-23
Supplement: s1 [file s1]

## Supplementary Materials

**Table S1.** Reasons for Unwillingness to Take COVID-19 Vaccination.

| Description                               | Frequency | Percentage of Reasons<br>for Unwillingness<br>(N = 482) | Frequency Percentage<br>of Reasons for<br>Unwillingness<br>(N = 608) |
|-------------------------------------------|-----------|---------------------------------------------------------|----------------------------------------------------------------------|
| Not rigorous in the fast-tracking process | 296       | 61.41%                                                  | 48.68%                                                               |
| Worried about side effects                | 184       | 38.17%                                                  | 30.26%                                                               |
| No need                                   | 54        | 11.20%                                                  | 8.88%                                                                |
| Uncertainty of utility                    | 51        | 10.58%                                                  | 8.39%                                                                |
| Don't know/ No comments                   | 10        | 2.07%                                                   | 1.64%                                                                |
| Priority for people in need               | 7         | 1.45%                                                   | 1.15%                                                                |
| Fear of needles or injections             | 5         | 1.04%                                                   | 0.82%                                                                |
| No response                               | 1         | 0.21%                                                   | 0.16%                                                                |

**Table S2.** Reasons for Previously Refusing Vaccines.

| Description                            | Frequency | Percentage of Reasons for<br>Refusal Experience<br>(N = 313) | Frequency Percentage of<br>Reasons for Refusal Experience<br>(N = 381) |
|----------------------------------------|-----------|--------------------------------------------------------------|------------------------------------------------------------------------|
| Worried about side effects             | 116       | 37.06%                                                       | 30.45%                                                                 |
| No need                                | 56        | 17.89%                                                       | 14.70%                                                                 |
| Feel healthy                           | 46        | 14.70%                                                       | 12.07%                                                                 |
| Worried about vaccine quality          | 41        | 13.10%                                                       | 10.76%                                                                 |
| Busy or inconvenient                   | 34        | 10.86%                                                       | 8.92%                                                                  |
| Poor physical condition                | 17        | 5.43%                                                        | 4.46%                                                                  |
| Don't know/ No comments                | 15        | 4.79%                                                        | 3.94%                                                                  |
| Distrust of modern medicine            | 13        | 4.15%                                                        | 3.41%                                                                  |
| Distrust the government's advice       | 13        | 4.15%                                                        | 3.41%                                                                  |
| Medical not recommended                | 7         | 2.24%                                                        | 1.84%                                                                  |
| Personal bad experience                | 7         | 2.24%                                                        | 1.84%                                                                  |
| Fear of needles or injections          | 6         | 1.92%                                                        | 1.57%                                                                  |
| It's fine if others have a vaccination | 2         | 0.64%                                                        | 0.52%                                                                  |
| Out of stock                           | 2         | 0.64%                                                        | 0.52%                                                                  |
| No response                            | 2         | 0.64%                                                        | 0.52%                                                                  |
| Others                                 | 4         | 1.28%                                                        | 1.05%                                                                  |
